# Supplementary material for: A nanocomposite membrane composed of incorporated nano-alumina within sulfonated PVDF-co-HFP/Nafion blend as separating barrier in a single chambered microbial fuel cell
Source: Royal Society of Chemistry journal article supplement (doi:10.1039/c6ra03598a), 2016-01-01
Supplement: c6ra03598a1.pdf [file c6ra03598a1.pdf]

## **Supporting Information**

### **Nanocomposite membrane composed of nano-alumina within sulfonated PVDF-co-HFP/Nafion blend as separating barrier in single chambered microbial fuel cell**

Vikash Kumar, Piyush Kumar, Arpita Nandy, Patit P. Kundu\*

\*Advanced Polymer Laboratory, Department of Polymer Science and Technology, University of Calcutta, 92, A.P.C Road, Kolkata – 700009, India.

\*Corresponding author Tel.: +91 2350 1397; fax: +91 2352 5106. E-mail address: ppk923@yahoo.com (P.P. Kundu).

Fig S1. FT-IR of membranes

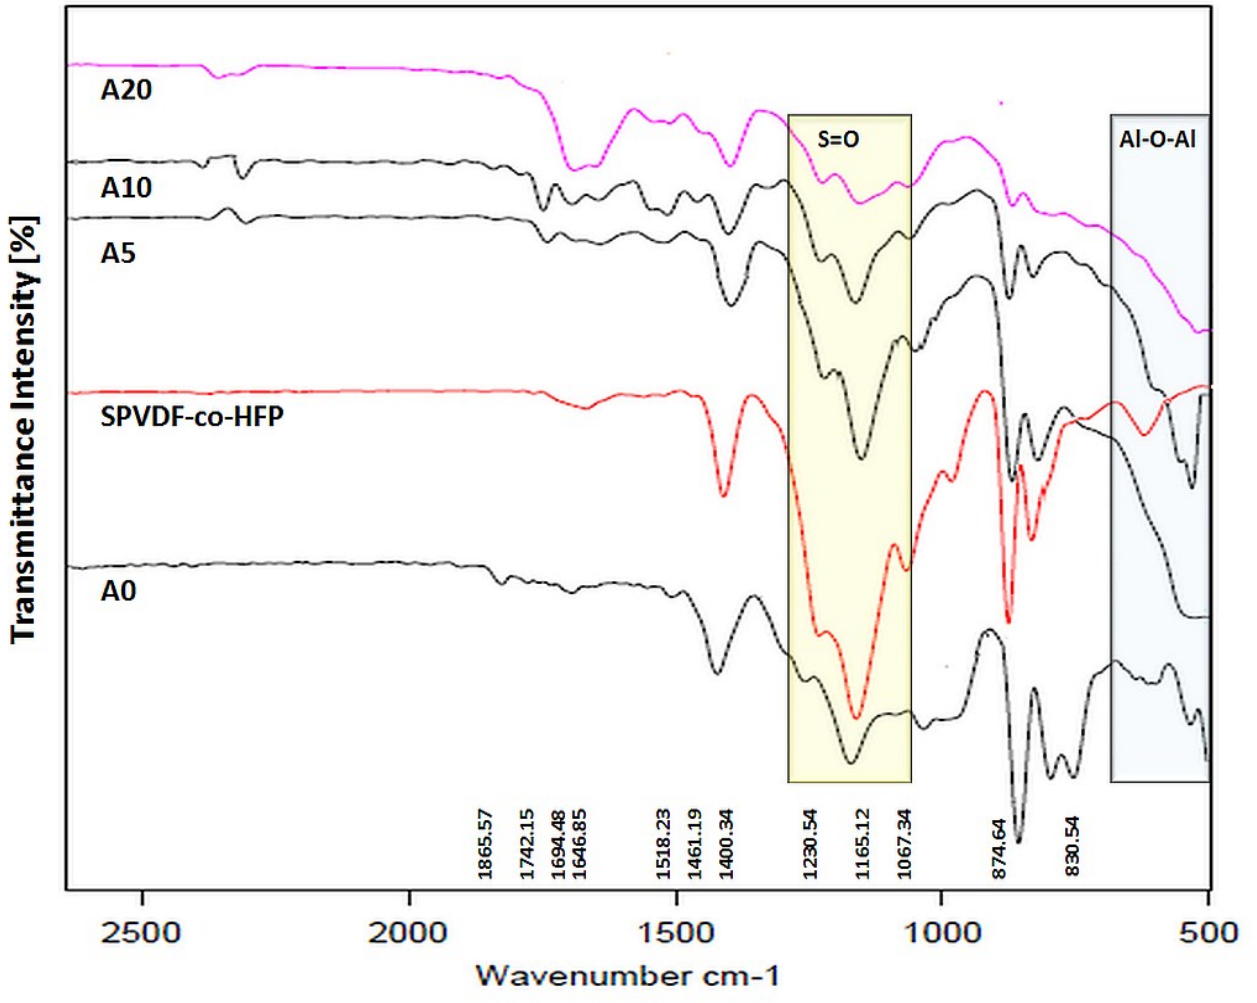

Fig S2. Nano- $\text{Al}_2\text{O}_3$  doped sulfonated PVDF-co-HFP/Nafion nanocomposite membranes

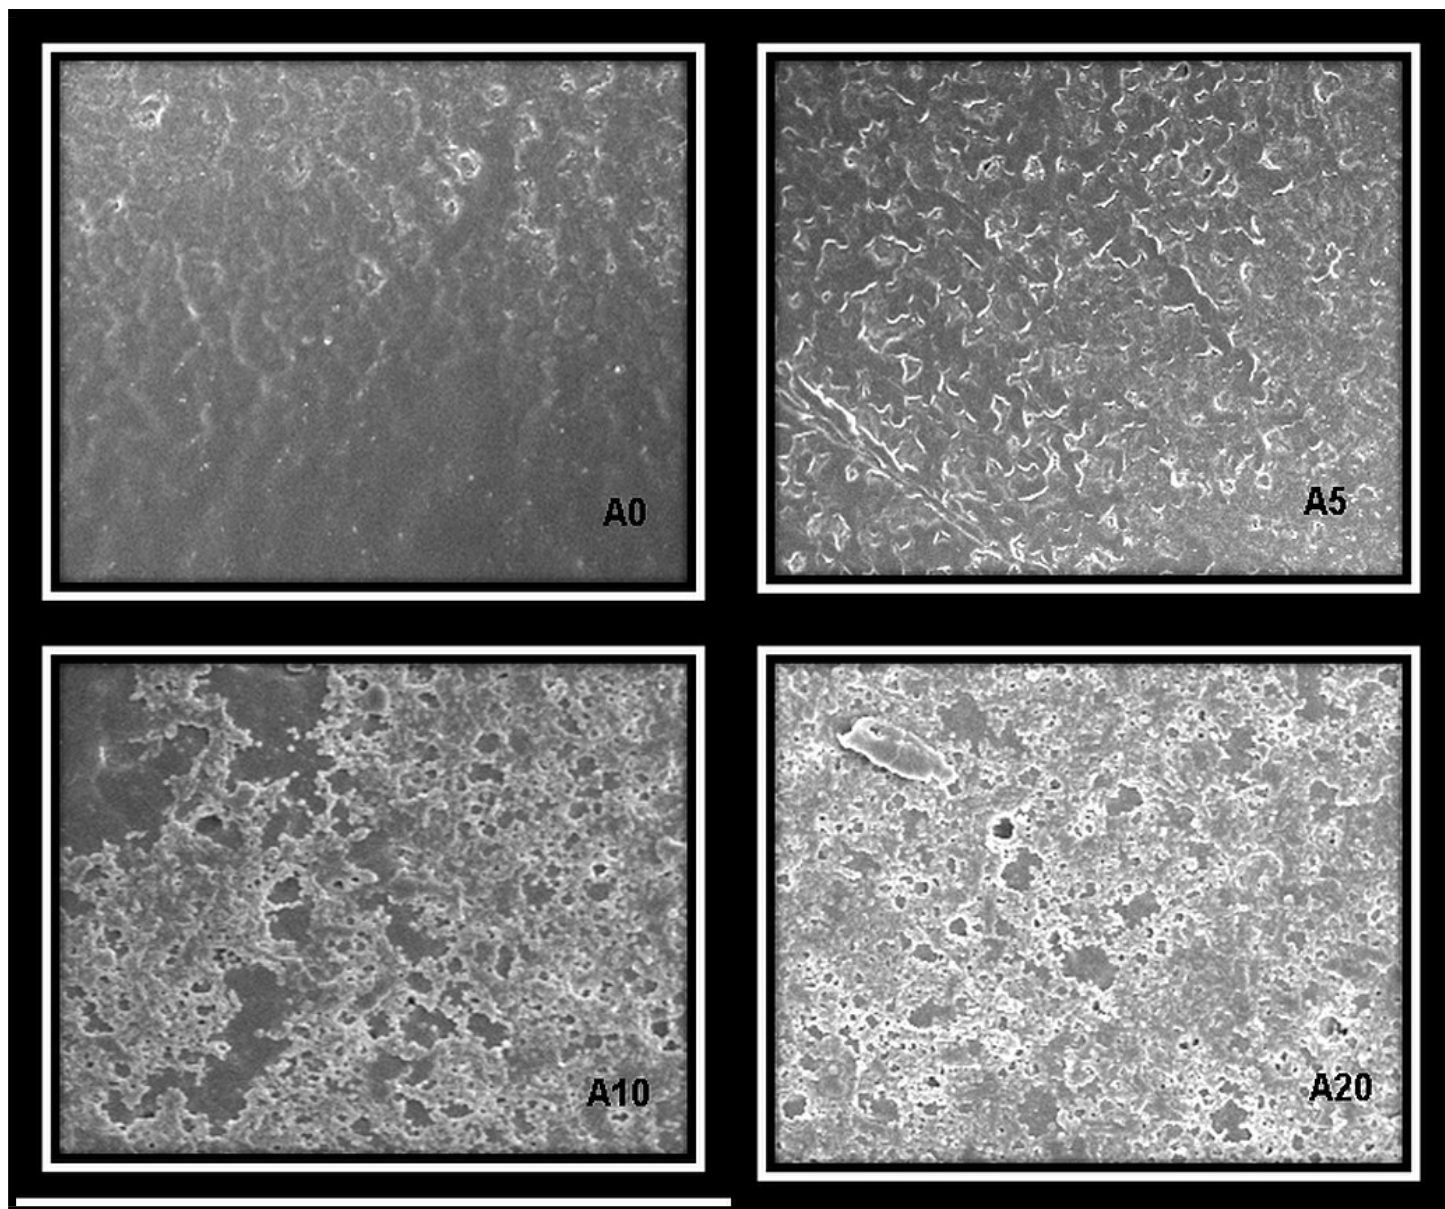

Fig S3. Cell performance at different resistances

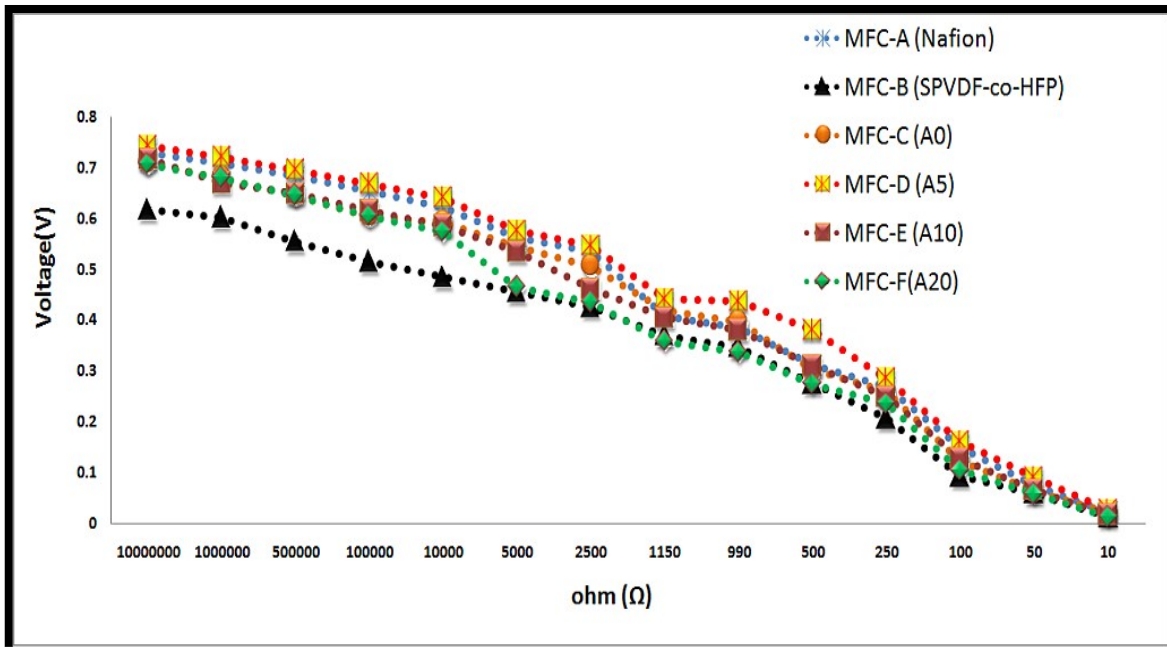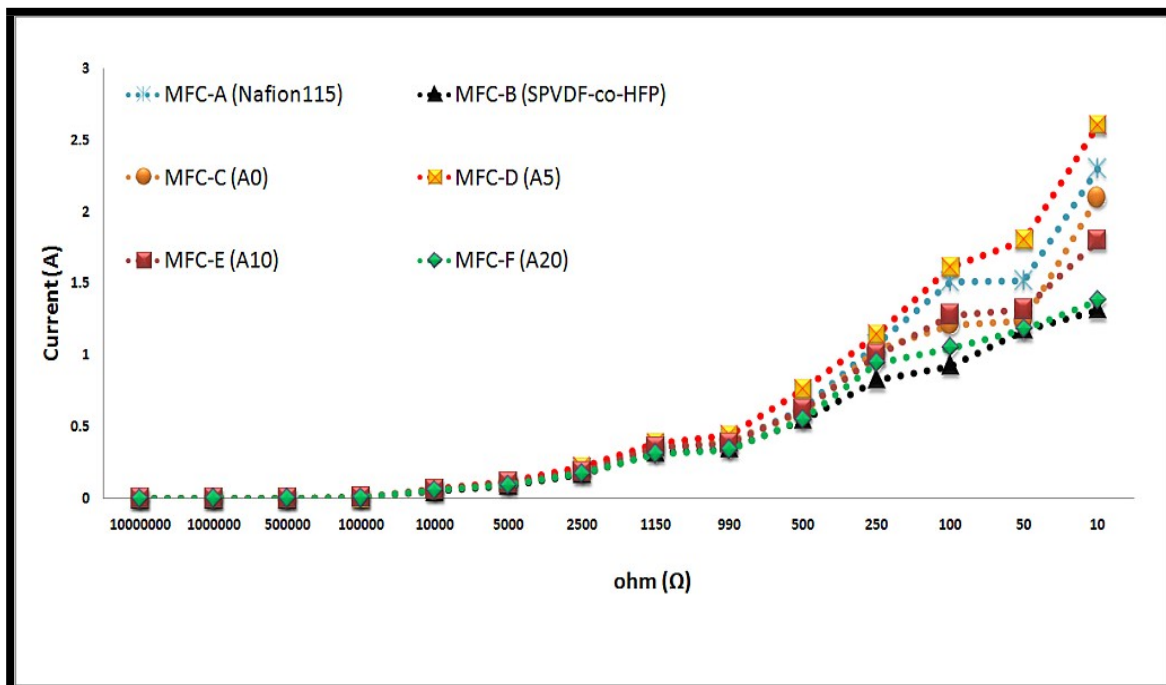

Table T1. A comparative study of MFCs in terms of power generation using different membranes

| <u>MFC Type</u>                          | <u>Electrodes</u> | <u>Used Membranes</u>                                                        | <u>Maximum Power density</u>               | <u>References</u> |
|------------------------------------------|-------------------|------------------------------------------------------------------------------|--------------------------------------------|-------------------|
| Dual chamber with oxygen flow at cathode | Carbon papers     | Nafion 117                                                                   | 600 mWm <sup>-2</sup>                      | 1                 |
| Air cathode MFC                          | Carbon Brush      | Glass fibers                                                                 | 240±22 mWm <sup>-2</sup>                   | 2                 |
|                                          | Carbon Mesh       | Coated Glass fibers                                                          | 230 ± 3.3 mWm <sup>-2</sup>                |                   |
| Air cathode MFC                          | Carbon papers     | Nafion 117                                                                   | 239.4 mWm <sup>-2</sup>                    | 3                 |
| Air cathode MFC                          | Carbon papers     | SPEEK/PES                                                                    | 170 mWm <sup>-2</sup>                      | 4                 |
| Dual chamber                             | Graphite Plates   | Fe <sub>3</sub> O <sub>4</sub> /PES nanocomposite                            | 20 mWm <sup>-2</sup>                       | 5                 |
| Single chamber (tubular) MFC             | Carbon cloths     | GO-PVA-STA composite                                                         | 139 mWm <sup>-2</sup>                      | 6                 |
| Single chambered MFC                     | Carbon cloths     | J-cloth                                                                      | 280 ± 6 mWm <sup>-2</sup>                  | 7                 |
| Air cathode MFC                          | Carbon cloths     | Nano Al <sub>2</sub> O <sub>3</sub> doped SPVDF-co-HFP/ Nafion nanocomposite | 541.52 ± 27 mWm <sup>-2</sup> <sub>2</sub> | Present study     |

## References:

1. Prakash GKS, Viva FA, Bretschger O, Yang B, El-Naggar M, Nealsen K. Inoculation procedures and characterization of membrane electrode assemblies for microbial fuel cells. *J Power Sources* 2010; 195:111–7.
2. Hays S, Zhang F, Logan BE. Performance of two different types of anodes in membrane electrode assembly microbial fuel cells for power generation from domestic wastewater. *J Power Sources* 2011; 196:8293–300.
3. Lu N, Zhou SG, Zhuang L, Zhang JT, Ni JR. Electricity generation from starch processing waste-water using microbial fuel cell technology. *Biochem Eng J* 2009; 43:246–51.
4. Lim, S. S.; Daud, W. R. W.; Md Jahim, J.; Ghasemi, M.; Chong, P. S.; Ismail, M. Sulfonated Poly(ether Ether Ketone)/poly(ether Sulfone) Composite Membranes as an Alternative Proton Exchange Membrane in Microbial Fuel Cells. *International Journal of Hydrogen Energy* 2012, 37, 11409–11424.
5. Rahimnejad, M.; Ghasemi, M.; Najafpour, G. D.; Ismail, M.; Mohammad, A. W.; Ghoreyshi, A. A.; Hassan, S. H. A. Synthesis, Characterization and Application Studies of Self-made Fe<sub>3</sub>O<sub>4</sub>/PES Nanocomposite Membranes in Microbial Fuel Cell. *Electrochimica Acta* 2012, 85, 700–706.
6. Santimoy Khilari, Soumya Pandit, Makarand M. Ghangrekar, Debabrata Pradhan, Debabrata Das, Graphene oxide impregnated PVA-STA composite polymer electrolyte membrane separator for power generation in single chambered Microbial Fuel Cell. *Industrial & Engineering Chemistry Research* 2013, 52, 11597–11606.
7. Fang Zhang, Yongtae Ahn, Bruce E. Logan, Treating refinery wastewaters in microbial fuel cells using separator electrode assembly or spaced electrode configurations. *Bioresource Technology* 2014, 152, 46–52

Fig S4. 16S rDNA sequences of employed microbes.

Download [GenBank](#) [Graphics](#)

Uncultured *Lysinibacillus* sp. partial 16S rRNA gene, isolate VA5  
 Sequence ID: [emb|HE648059.1](#) Length: 320 Number of Matches: 1

Range 1: 1 to 320 [GenBank](#) [Graphics](#) ▼ Next Match ▲ Previous Match

| Score         | Expect                                                        | Identities    | Gaps      | Strand    |
|---------------|---------------------------------------------------------------|---------------|-----------|-----------|
| 584 bits(316) | 3e-163                                                        | 320/320(100%) | 0/320(0%) | Plus/Plus |
| Query 1       | CTCAGATTTATTATTGCGCCACGWGRGAGCTTGCTCCTTTGACGTTAGCGGCGGACGGGTG | 60            |           |           |
| Sbjct 1       | CTCAGATTTATTATTGCGCCACGWGRGAGCTTGCTCCTTTGACGTTAGCGGCGGACGGGTG | 60            |           |           |
| Query 61      | AGTAACACGTGGGCAACCTACCCTATAGTTTGGGATAAATCCGGGAAACCGGGCTAATA   | 120           |           |           |
| Sbjct 61      | AGTAACACGTGGGCAACCTACCCTATAGTTTGGGATAAATCCGGGAAACCGGGCTAATA   | 120           |           |           |
| Query 121     | CCGAATAATCTCTTTTGCTTCATGGTGAAAGACTGAAAGACGGTTTCGGCTGTCGCTATA  | 180           |           |           |
| Sbjct 121     | CCGAATAATCTCTTTTGCTTCATGGTGAAAGACTGAAAGACGGTTTCGGCTGTCGCTATA  | 180           |           |           |
| Query 181     | GGATGGGCCCGCGGCGCATTAGCTAGTTGGTGAGGTAACGGCTCACCAAGGCGACGATGC  | 240           |           |           |
| Sbjct 181     | GGATGGGCCCGCGGCGCATTAGCTAGTTGGTGAGGTAACGGCTCACCAAGGCGACGATGC  | 240           |           |           |
| Query 241     | GTAGCCGACCTGAGAGGGTGATCGGCCACACTGGGACTGAGACACGGCCAGACTCCTAC   | 300           |           |           |
| Sbjct 241     | GTAGCCGACCTGAGAGGGTGATCGGCCACACTGGGACTGAGACACGGCCAGACTCCTAC   | 300           |           |           |
| Query 301     | GGGAGGCAGCAGTGGGACTC                                          | 320           |           |           |
| Sbjct 301     | GGGAGGCAGCAGTGGGACTC                                          | 320           |           |           |

Download [GenBank](#) [Graphics](#)

Uncultured *Lysinibacillus* sp. partial 16S rRNA gene, isolate VA1  
 Sequence ID: [emb|HE648060.1](#) Length: 319 Number of Matches: 1

Range 1: 1 to 319 [GenBank](#) [Graphics](#) ▼ Next Match ▲ Previous Match

| Score         | Expect                                                        | Identities    | Gaps      | Strand    |
|---------------|---------------------------------------------------------------|---------------|-----------|-----------|
| 575 bits(311) | 2e-160                                                        | 319/319(100%) | 0/319(0%) | Plus/Plus |
| Query 1       | CACCTACCACCTCTSGAYCAGCAGWGGGAAGCTTGCTCCTTTGACGTTAGCGGCGGACGGG | 60            |           |           |
| Sbjct 1       | CACCTACCACCTCTSGAYCAGCAGWGGGAAGCTTGCTCCTTTGACGTTAGCGGCGGACGGG | 60            |           |           |
| Query 61      | TGAGTAACACGTGGGCAACCTACCTTATAGTTTGGGATAAATCCGGGAAACCGGGCTAA   | 120           |           |           |
| Sbjct 61      | TGAGTAACACGTGGGCAACCTACCTTATAGTTTGGGATAAATCCGGGAAACCGGGCTAA   | 120           |           |           |
| Query 121     | TACCGAATAATCTRTTTCACCTCATGGTGAAATATTGAAAGACGGTTTCGGCTGTCGCTA  | 180           |           |           |
| Sbjct 121     | TACCGAATAATCTRTTTCACCTCATGGTGAAATATTGAAAGACGGTTTCGGCTGTCGCTA  | 180           |           |           |
| Query 181     | TAGGATGGGCCCGCGGCGCATTAGCTAGTTGGTGAGGTAACGGCTCACCAAGGCGACGAT  | 240           |           |           |
| Sbjct 181     | TAGGATGGGCCCGCGGCGCATTAGCTAGTTGGTGAGGTAACGGCTCACCAAGGCGACGAT  | 240           |           |           |
| Query 241     | GCGTAGCCGACCTGAGAGGGTGATCGGCCACACTGGGACTGAGACACGGCCAGACTCCT   | 300           |           |           |
| Sbjct 241     | GCGTAGCCGACCTGAGAGGGTGATCGGCCACACTGGGACTGAGACACGGCCAGACTCCT   | 300           |           |           |
| Query 301     | ACGGGAGGCAGCAGTGGGA                                           | 319           |           |           |
| Sbjct 301     | ACGGGAGGCAGCAGTGGGA                                           | 319           |           |           |

[Download](#) [GenBank](#) [Graphics](#)

Uncultured bacterium partial 16S rRNA gene, isolate VA3

Sequence ID: [emb|HF548664.1|](#) Length: 322 Number of Matches: 1

Range 1: 1 to 322 [GenBank](#) [Graphics](#)

[Next Match](#) [Previous Match](#)

| Score         | Expect                                                       | Identities    | Gaps      | Strand    |
|---------------|--------------------------------------------------------------|---------------|-----------|-----------|
| 573 bits(310) | 7e-160                                                       | 322/322(100%) | 0/322(0%) | Plus/Plus |
| Query 1       | ATGCAGATTGCCTCGCTCWGATCGCAGAGRGARCTTGCTCCTTTGACGTTAGCGGCGGAC | 60            |           |           |
| Sbjct 1       | ATGCAGATTGCCTCGCTCWGATCGCAGAGRGARCTTGCTCCTTTGACGTTAGCGGCGGAC | 60            |           |           |
| Query 61      | GGGTGAGTAACACGTGGGCMAYCTACCTTATAGTTTGGGATAAATCCGGGAAACCGGGGC | 120           |           |           |
| Sbjct 61      | GGGTGAGTAACACGTGGGCMAYCTACCTTATAGTTTGGGATAAATCCGGGAAACCGGGGC | 120           |           |           |
| Query 121     | TAATACCGAATAATCTRTTTCACCTCATGGTGAAATATTGAAAGACGGTTTCGGCTGTCG | 180           |           |           |
| Sbjct 121     | TAATACCGAATAATCTRTTTCACCTCATGGTGAAATATTGAAAGACGGTTTCGGCTGTCG | 180           |           |           |
| Query 181     | CTATAGGATGGGCCCGCGGCGCATTAGCTAGTTGGTGAGGTAACGGCTCACCAAGGCGAC | 240           |           |           |
| Sbjct 181     | CTATAGGATGGGCCCGCGGCGCATTAGCTAGTTGGTGAGGTAACGGCTCACCAAGGCGAC | 240           |           |           |
| Query 241     | GATGCGTAGCCGACCTGAGAGGGTGATCGGCCACACTGGGACTGAGACACGGCCAGACT  | 300           |           |           |
| Sbjct 241     | GATGCGTAGCCGACCTGAGAGGGTGATCGGCCACACTGGGACTGAGACACGGCCAGACT  | 300           |           |           |
| Query 301     | CCTACGGGAGGCAGCAGTGGGA                                       | 322           |           |           |
| Sbjct 301     | CCTACGGGAGGCAGCAGTGGGA                                       | 322           |           |           |



Phylogenetic tree based on 16S rDNA sequences of *Lysinibacillus species* (A,B and C) with closely related species using neighbor joining alignment

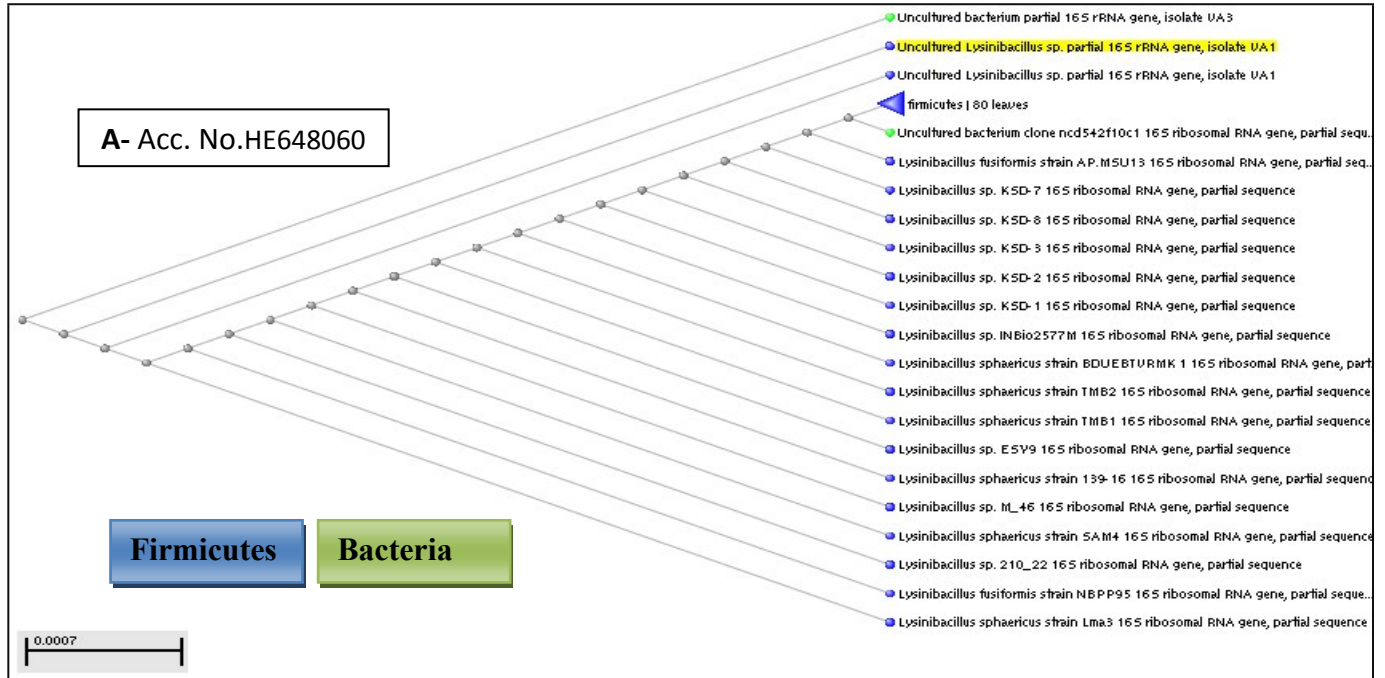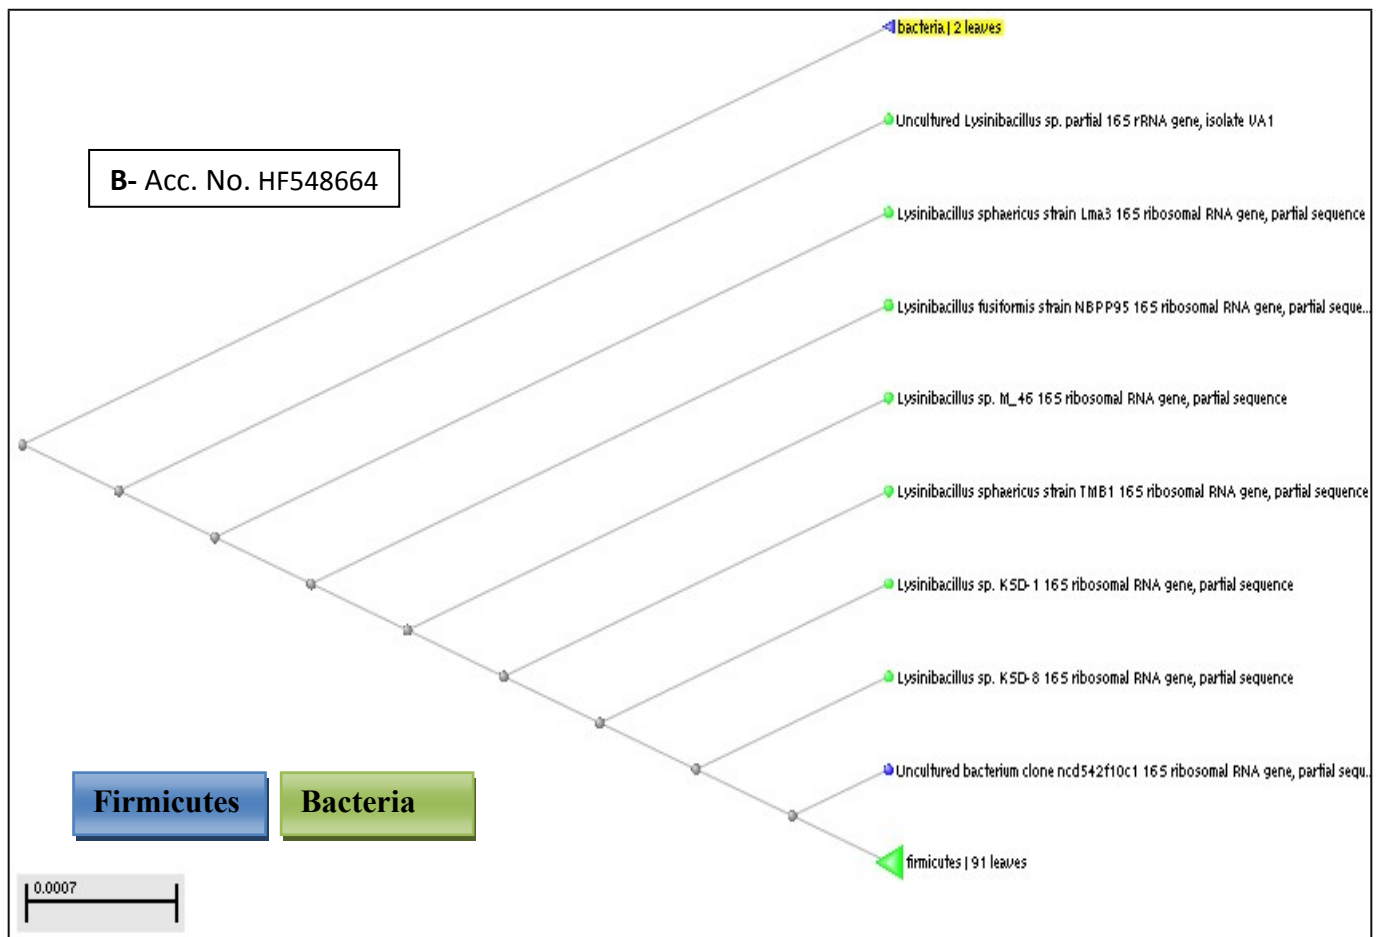

C- Acc. No.HE648059

Firmicutes

Bacteria

0.0007

- Lysinibacillus xylanilyticus strain JKR42 16S ribosomal RNA gene, partial sequ...
- Bacterium Or5F 16S ribosomal RNA gene, partial sequence
- Lysinibacillus fusiformis strain WF16 16S ribosomal RNA gene, partial sequence
- Uncultured Lysinibacillus sp. partial 16S rRNA gene, isolate UA5
- Lysinibacillus fusiformis strain BAB-114 16S ribosomal RNA gene, partial sequ...
- Lysinibacillus fusiformis strain BAB-112 16S ribosomal RNA gene, partial sequ...
- Bacillales bacterium CuL\_0304 16S ribosomal RNA gene, partial sequence
- Lysinibacillus boronitolerans strain REN68N 16S ribosomal RNA gene, partial s...
- Lysinibacillus fusiformis strain N139 16S ribosomal RNA gene, partial sequence
- Lysinibacillus fusiformis strain N169 16S ribosomal RNA gene, partial sequence
- Lysinibacillus fusiformis strain MNJ-001 16S ribosomal RNA gene, partial sequ...
- Lysinibacillus fusiformis 16S ribosomal RNA gene, partial sequence
- Lysinibacillus xylanilyticus strain GR8 16S ribosomal RNA gene, partial sequence
- Lysinibacillus xylanilyticus strain GT16 16S ribosomal RNA gene, partial sequ...
- Lysinibacillus xylanilyticus strain GT18 16S ribosomal RNA gene, partial sequ...
- Lysinibacillus xylanilyticus strain HUT18 16S ribosomal RNA gene, partial sequ...
- Lysinibacillus xylanilyticus strain SK3 16S ribosomal RNA gene, partial sequ...
- Bacillus sp. 57-10F 16S ribosomal RNA gene, partial sequence
- Lysinibacillus fusiformis strain BAB770 16S ribosomal RNA gene, partial sequ...
- Lysinibacillus fusiformis strain BAB755 16S ribosomal RNA gene, partial sequ...
- Uncultured bacterium clone I99 16S ribosomal RNA gene, partial sequence
- Uncultured bacterium clone I85 16S ribosomal RNA gene, partial sequence
- Uncultured bacterium clone I65 16S ribosomal RNA gene, partial sequence
- Bacillaceae bacterium SE41 16S ribosomal RNA gene, partial sequence
- Lysinibacillus fusiformis strain BPM1 2-1 16S ribosomal RNA gene, partial sequ...
- Lysinibacillus fusiformis strain Y11 16S ribosomal RNA gene, partial sequence
- Lysinibacillus fusiformis strain CW1(3) 16S ribosomal RNA gene, partial sequ...
- Lysinibacillus fusiformis strain Asd5 16S ribosomal RNA gene, partial sequ...
- Lysinibacillus sp. IARI-B-3 16S ribosomal RNA gene, partial sequence
- Lysinibacillus boronitolerans strain YNB15 16S ribosomal RNA gene, partial se...
- Bacillus sp. NBRC 100906 gene for 16S rRNA, partial sequence
- Lysinibacillus xylanilyticus strain HD16\_4A 16S ribosomal RNA gene, partial se...
- Lysinibacillus xylanilyticus strain BN22\_2B 16S ribosomal RNA gene, partial se...
- Lysinibacillus sp. AUBTP7 16S ribosomal RNA gene, partial sequence
- Lysinibacillus sp. FB1 16S ribosomal RNA gene, partial sequence
- Lysinibacillus sp. NCCP-195 gene for 16S rRNA, partial sequence
- Lysinibacillus fusiformis strain B2 16S ribosomal RNA gene, partial sequ...
- Uncultured Lysinibacillus sp. clone HaG17 16S ribosomal RNA gene, partial sequ...
- Lysinibacillus fusiformis strain ANA81 16S ribosomal RNA gene, partial sequ...
- Lysinibacillus xylanilyticus strain G1Ba-8 16S ribosomal RNA gene, partial sequ...
- Lysinibacillus xylanilyticus strain J9B-26 16S ribosomal RNA gene, partial sequ...
- Lysinibacillus sp. 3405BRRJ 16S ribosomal RNA gene, partial sequence
- Lysinibacillus xylanilyticus strain 10L1 16S ribosomal RNA gene, partial sequ...
- Lysinibacillus xylanilyticus strain 5L54 16S ribosomal RNA gene, partial sequ...
- Lysinibacillus fusiformis strain R5 16S ribosomal RNA gene, partial sequ...
- Lysinibacillus fusiformis strain R2 16S ribosomal RNA gene, partial sequ...
- Lysinibacillus fusiformis strain DZQ17-H 16S ribosomal RNA gene, partial sequ...
- Lysinibacillus fusiformis strain AIMST 11.K11.1 16S ribosomal RNA gene, partial
- Bacillus sp. PA07 16S ribosomal RNA gene, partial sequence
- Lysinibacillus fusiformis strain Loyola PBB 1 16S ribosomal RNA gene, partial s...
- Lysinibacillus fusiformis strain MCH11 16S ribosomal RNA gene, partial sequ...
- Bacillus sp. WF21 16S ribosomal RNA gene, partial sequence
- Lysinibacillus fusiformis strain B590 16S ribosomal RNA gene, partial sequ...
- Bacillus sp. WJ21 16S ribosomal RNA gene, partial sequence
- Lysinibacillus fusiformis strain KL2-13 16S ribosomal RNA gene, partial sequ...
- Lysinibacillus fusiformis strain UKRKC04 16S ribosomal RNA gene, partial sequ...
- Lysinibacillus fusiformis gene for 16S rRNA, partial sequence, strain: NCCP-30
- Bacillus sp. oral taxon A08 clone CA010 16S ribosomal RNA gene, partial sequ...
- Bacillus sp. oral taxon A08 clone CA009 16S ribosomal RNA gene, partial sequ...
- Bacillus sp. oral taxon A08 clone CA001 16S ribosomal RNA gene, partial sequ...
- Bacillus cereus strain ZQN7 16S ribosomal RNA gene, partial sequence
- Uncultured Bacillus sp. clone OT44-4 16S ribosomal RNA gene, partial sequ...
- Lysinibacillus fusiformis strain H-12 16S ribosomal RNA gene, partial sequ...
- Lysinibacillus fusiformis strain H-8 16S ribosomal RNA gene, partial sequ...
- Lysinibacillus sp. xfgu3 16S ribosomal RNA gene, partial sequence
- Lysinibacillus fusiformis strain B-40 16S ribosomal RNA gene, partial sequ...
- Lysinibacillus fusiformis strain B-25 16S ribosomal RNA gene, partial sequ...
- Lysinibacillus fusiformis strain B-1 16S ribosomal RNA gene, partial sequ...
- Uncultured Bacillus sp. clone DT90-3\_0rg 16S ribosomal RNA gene, partial seq...
- Bacillus sp. UP1 16S ribosomal RNA gene, partial sequence
- Lysinibacillus fusiformis strain IMAUB1005 16S ribosomal RNA gene, partial se...
- Lysinibacillus fusiformis strain IMAUB1006 16S ribosomal RNA gene, partial se...
- Lysinibacillus fusiformis strain IMAUB1017 16S ribosomal RNA gene, partial se...
- Lysinibacillus fusiformis 16S ribosomal RNA gene, partial sequence
- Bacillus sp. DN2.8 16S ribosomal RNA gene, partial sequence
- Lysinibacillus fusiformis strain 5-1-9-b 16S ribosomal RNA gene, partial sequ...
- Lysinibacillus fusiformis strain MK34 16S ribosomal RNA gene, partial sequ...
- Lysinibacillus boronitolerans 16S ribosomal RNA gene, partial sequence
- Uncultured Lysinibacillus sp. clone 18 16S ribosomal RNA gene, partial sequ...
- Lysinibacillus boronitolerans strain 2XG32V 16S ribosomal RNA gene, partial s...
- Lysinibacillus fusiformis strain B3B 16S ribosomal RNA gene, partial sequ...
- Lysinibacillus sp. EK-34 16S ribosomal RNA gene, partial sequence
- Lysinibacillus fusiformis strain PapinBa2 16S ribosomal RNA gene, partial sequ...
- Bacillus sp. PR5-6 16S ribosomal RNA gene, partial sequence
- Lysinibacillus fusiformis isolate 24 16S ribosomal RNA gene, partial sequ...
- Bacillus sp. PA24 partial 16S rRNA gene, isolate PA24
- Lysinibacillus fusiformis isolate EGU60 16S ribosomal RNA gene, partial sequ...
- Bacillus sphaericus isolate NUC-5 16S ribosomal RNA gene, partial sequ...
- Bacillus sp. 9e04 16S ribosomal RNA gene, partial sequence
- Bacillus sp. 9e05 16S ribosomal RNA gene, partial sequence
- Bacillus fusiformis strain LQ88 16S ribosomal RNA gene, partial sequ...
- Bacillus fusiformis isolate Id84 16S ribosomal RNA gene, partial sequ...
- Bacillus fusiformis isolate qd84 16S ribosomal RNA gene, partial sequ...
- Bacillus fusiformis isolate LLP 16S ribosomal RNA gene, partial sequ...
- Bacillus sp. 253-3.2-LH-H15(s)-05 16S ribosomal RNA gene, partial sequ...
- Bacillus sphaericus partial 16S rRNA gene, isolate OS-44.c1
- Bacillus fusiformis isolate BRL02-37 16S ribosomal RNA gene, partial sequ...
- Bacillus fusiformis isolate BRL02-34 16S ribosomal RNA gene, partial sequ...
- Bacillus sp. GD0302 16S ribosomal RNA gene, partial sequence
- Uncultured Lysinibacillus sp. partial 16S rRNA gene, isolate UA5
- Bacillus sphaericus strain LFB-Flocruz711 16S ribosomal RNA gene, partial seq...

Fig S5. Cyclic voltammograms of microbes

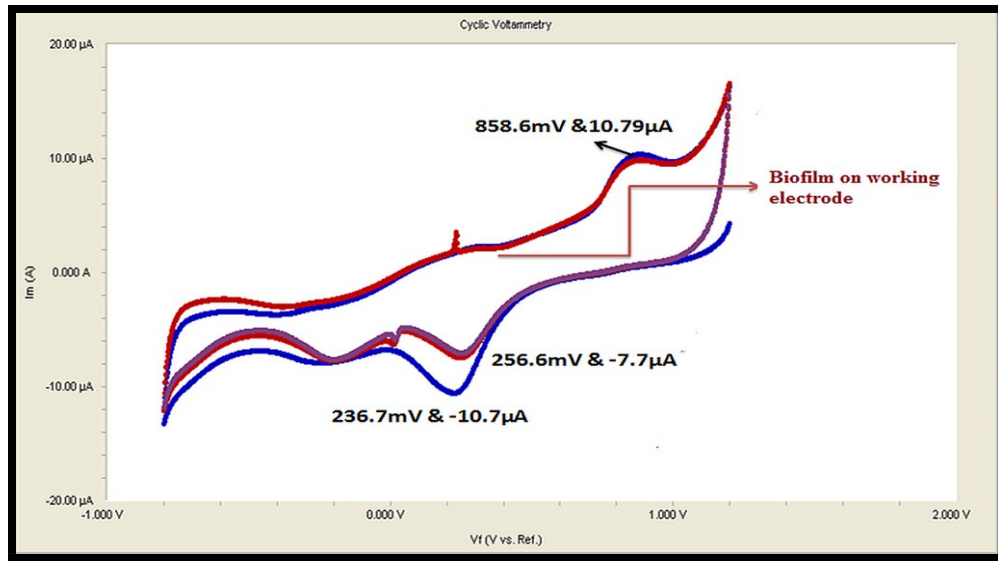

Electron transfer from biofilm to electrode indicated microbial oxidation, whereas reduction peaks corresponded towards microbial reduction (charge transfer from electrode to biofilm). This redox activity was attributed to the microbial cell surface proteins that evidently ensured its biocatalytic activity, resulting in subsequent substrate utilization from the employed *firmitutes* on repeated potential cycling.

Fig S6. SEM images of control (Left) and the formed biofilm colonies on the electrodes

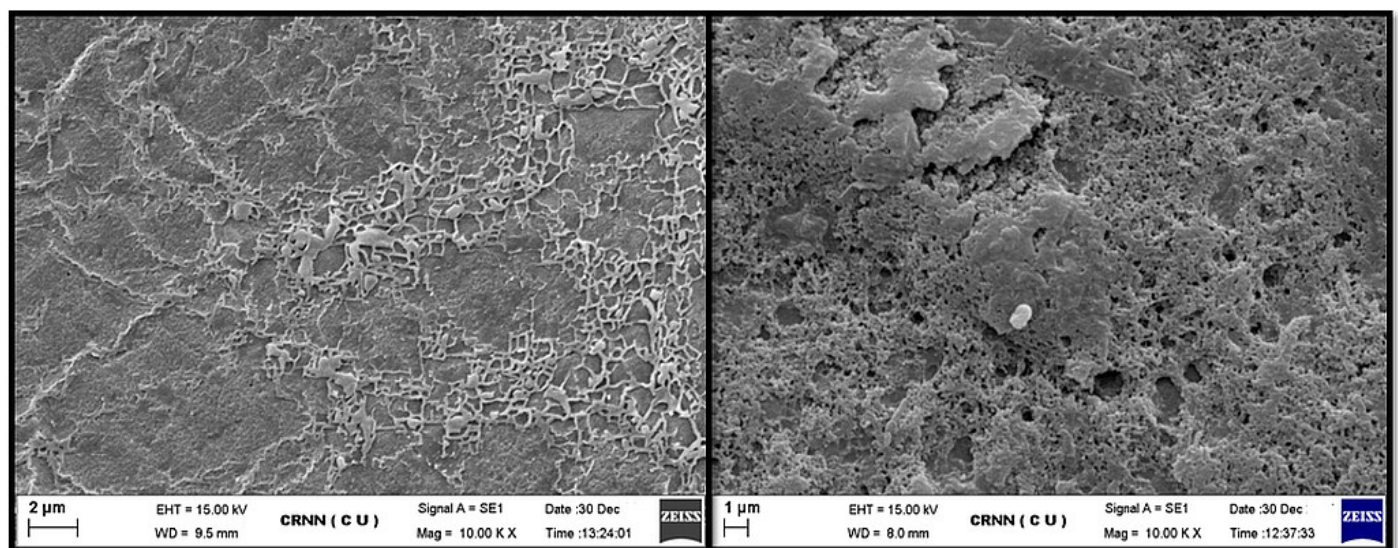

Fig S7. Schematic illustration for proton conductivity measurement.

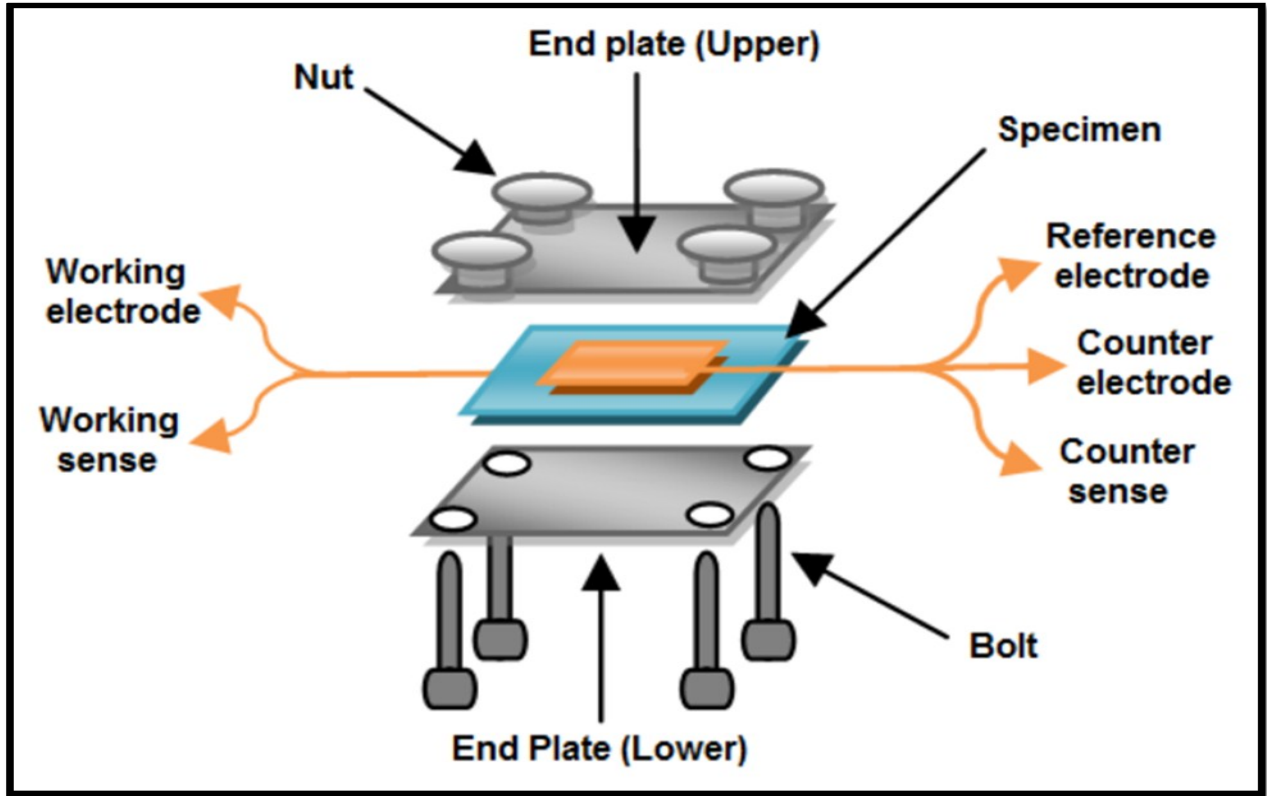

### Cost comparisons

| Membranes                                                          | Costs (USD)                |
|--------------------------------------------------------------------|----------------------------|
| Nafion                                                             | ~1.8-2.3\$/cm <sup>2</sup> |
| AEMs(e.g., AMI 7001)                                               | ~1.2-1.6\$/cm <sup>2</sup> |
| CEMs(e.g., CMI 7000)                                               | ~0.6-1.2\$/cm <sup>2</sup> |
| Glass fiber                                                        | ~0.34\$/100cm <sup>2</sup> |
| Wiper J-cloth                                                      | ~0.31\$/100cm <sup>2</sup> |
| Al <sub>2</sub> O <sub>3</sub> incorporated nanocomposite membrane | ~0.8\$/100cm <sup>2</sup>  |
